# Supplementary material
Source: PubMed Central journal article supplement (PMC8665111)
Supplement: NIHMS1749845-supplement-3.pdf [file NIHMS1749845-supplement-3.pdf]

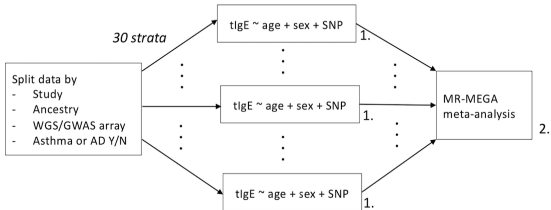

1. Linear mixed effect models including genetic PCs and kinship matrix using the SevenBridges GENESIS Single Variant Association tests workflow
2. A meta-regression approach that accounts for heterogeneity due to ancestry
