# Supplementary material
Source: PubMed Central journal article supplement (PMC8665111)

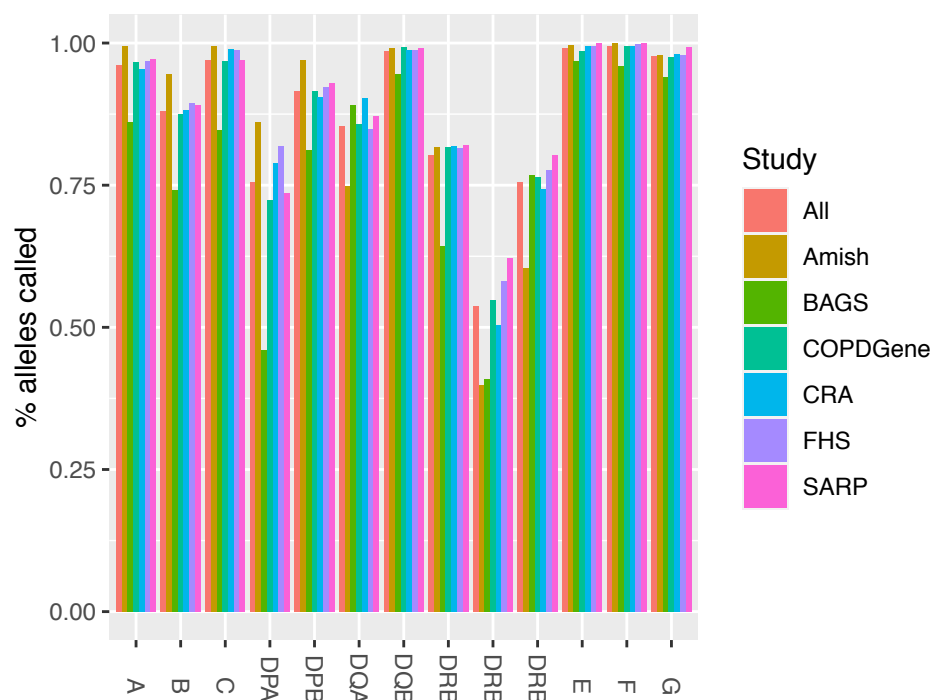

Supplement: NIHMS1749845-supplement-10.pdf [file NIHMS1749845-supplement-10.pdf]

% concordant allele calls

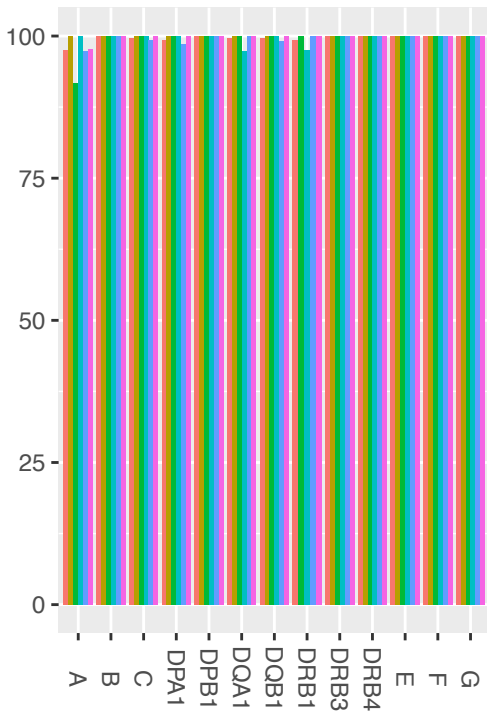

Supplement: NIHMS1749845-supplement-11.pdf [file NIHMS1749845-supplement-11.pdf]

% errors in trios

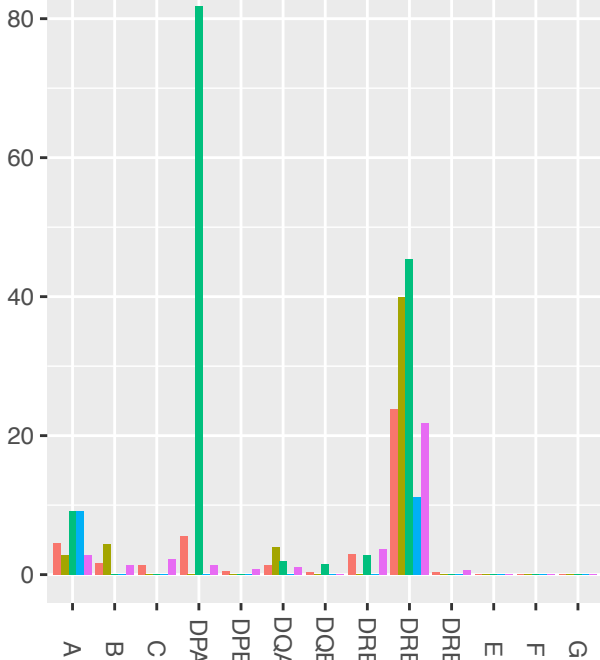

## Study

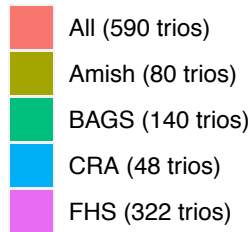

Supplement: NIHMS1749845-supplement-12.pdf [file NIHMS1749845-supplement-12.pdf]

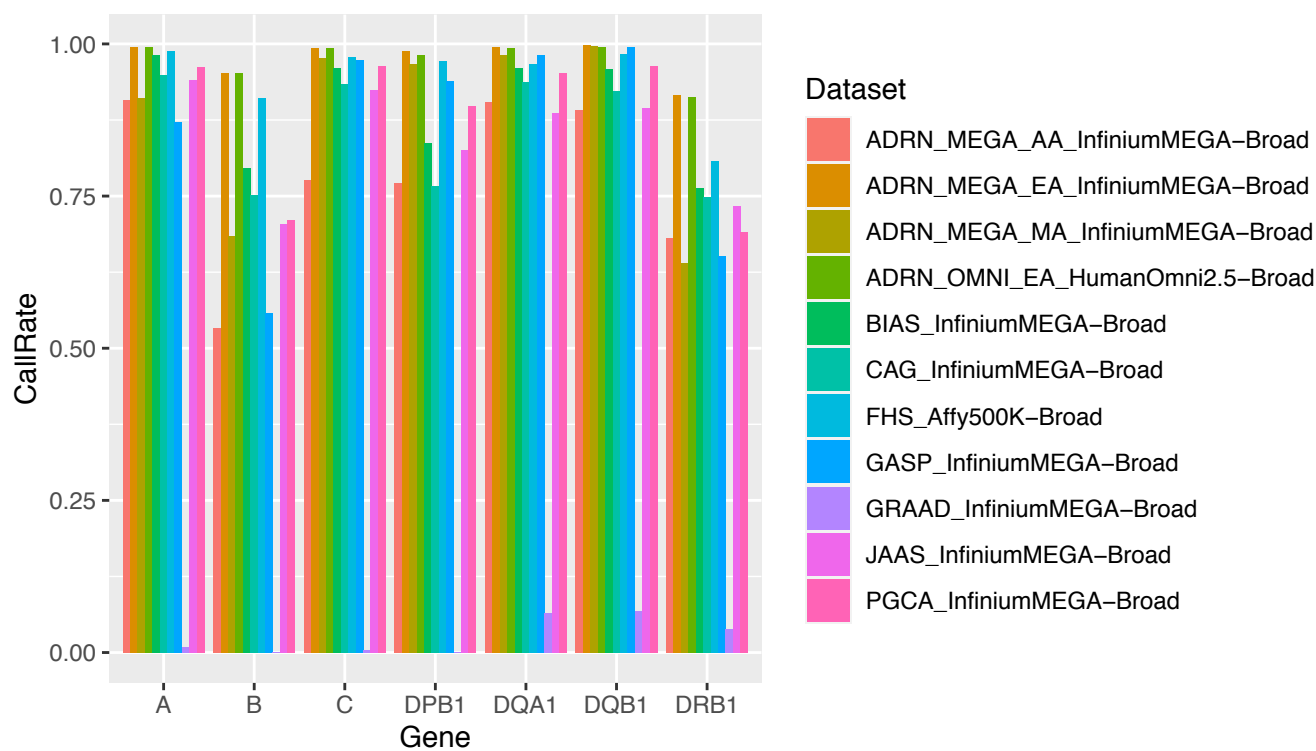

Supplement: NIHMS1749845-supplement-13.pdf [file NIHMS1749845-supplement-13.pdf]

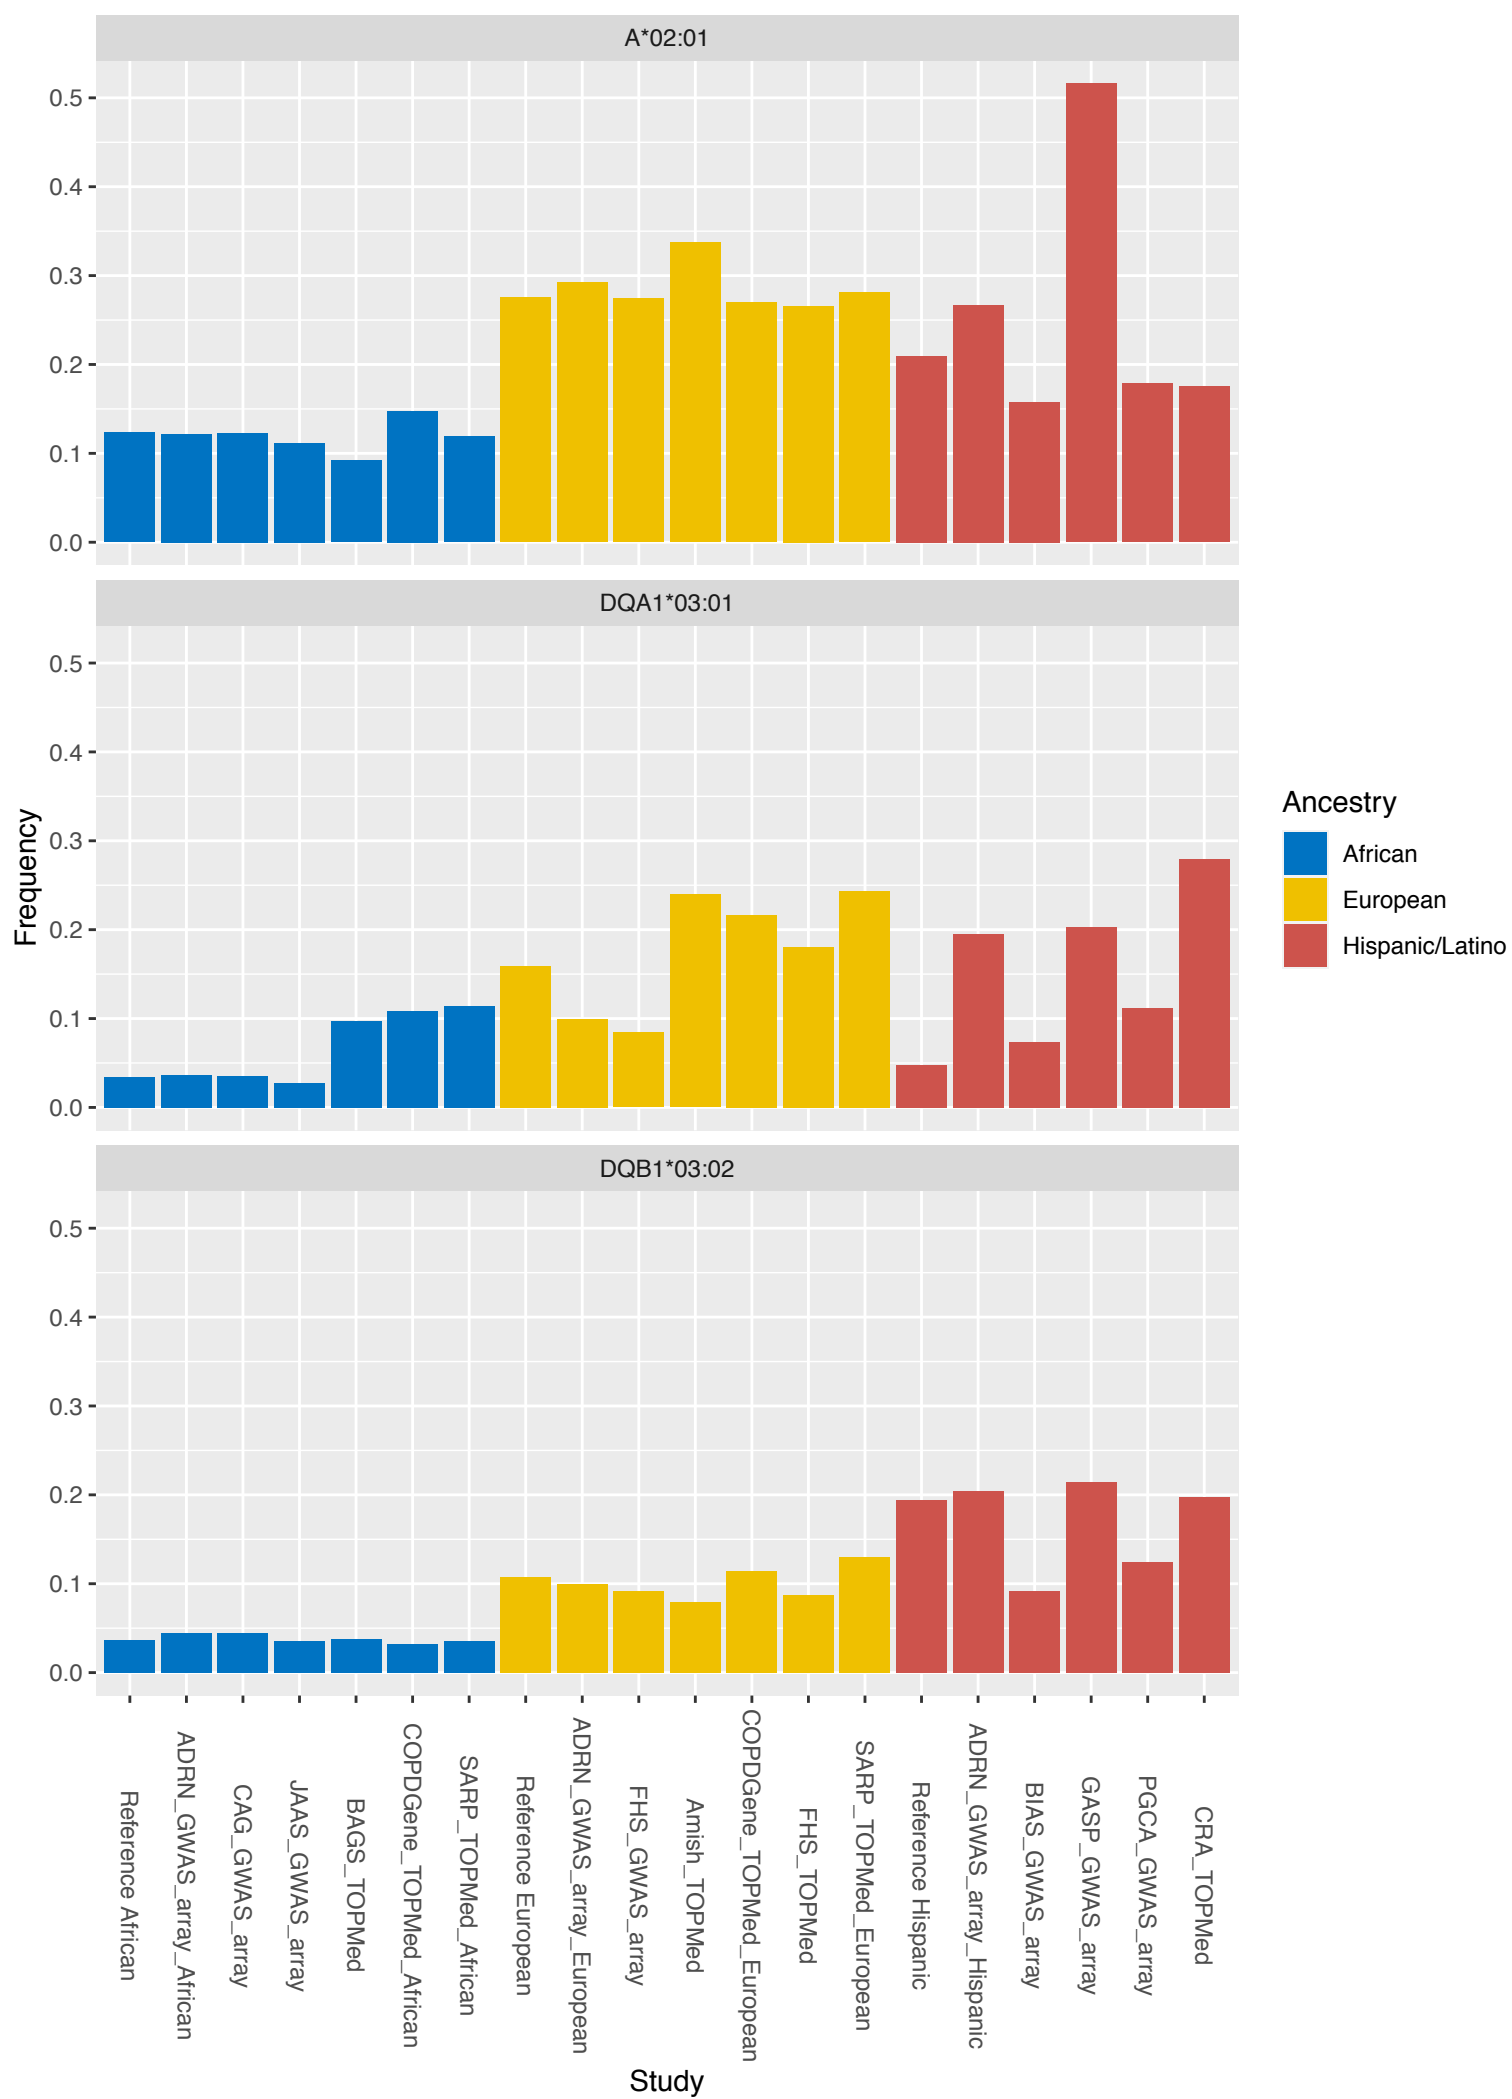

Supplement: NIHMS1749845-supplement-14.pdf [file NIHMS1749845-supplement-14.pdf]

### HLA-A\*02:01

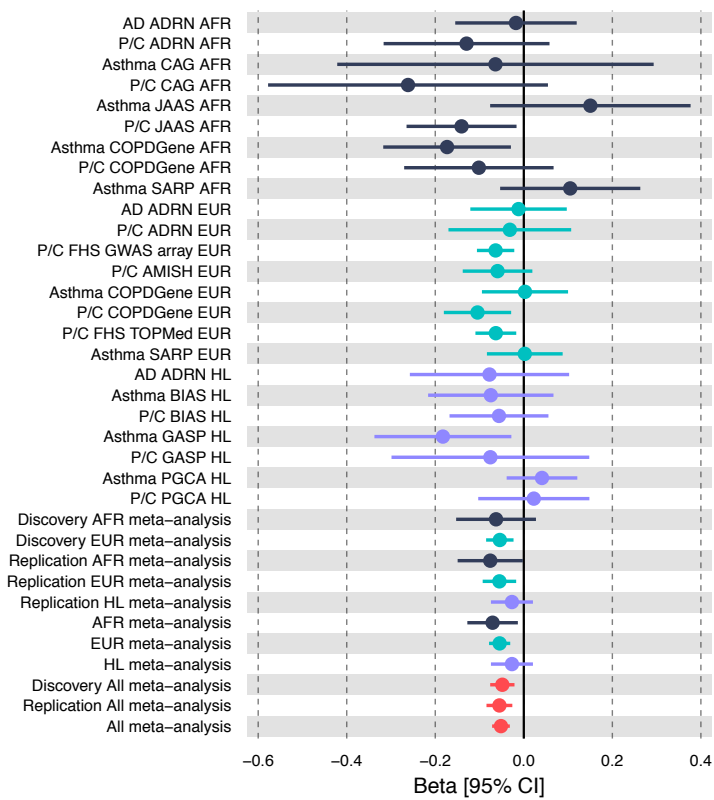

### HLA-DQA1\*03:01

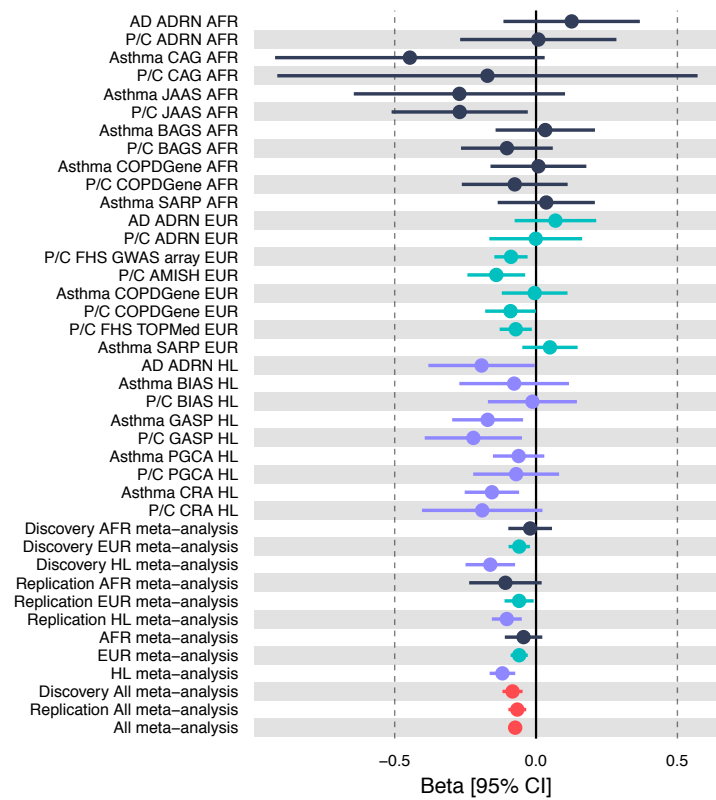

### HLA-DQB1\*03:02

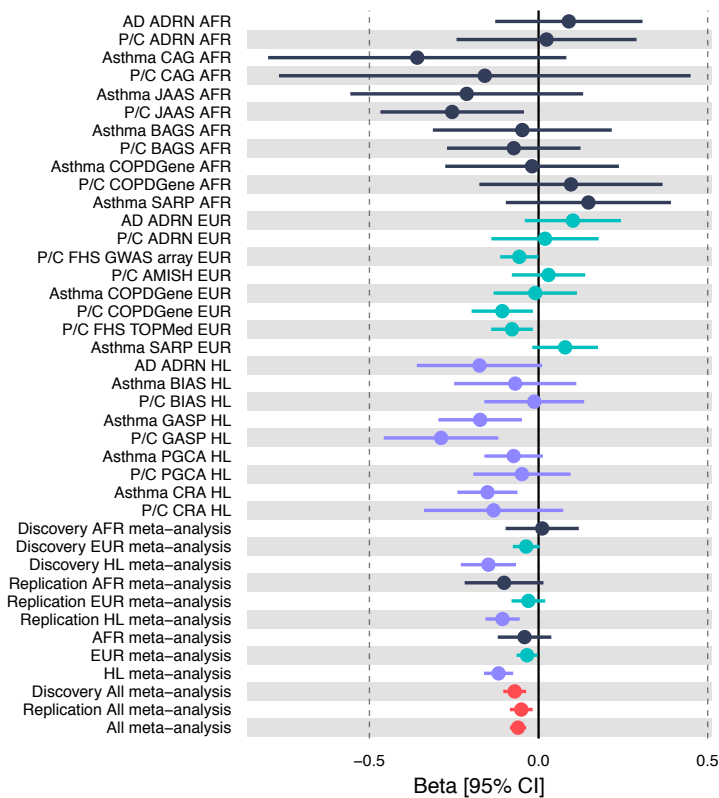

- African
- European
- Hispanic/Latino
- All

Supplement: NIHMS1749845-supplement-15.pdf [file NIHMS1749845-supplement-15.pdf]

**chr1q23.2 rs2251746**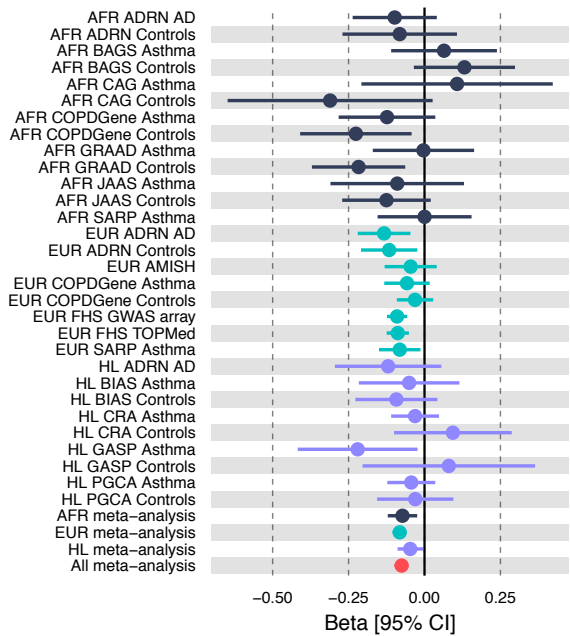**chr5q31.1 rs1295686**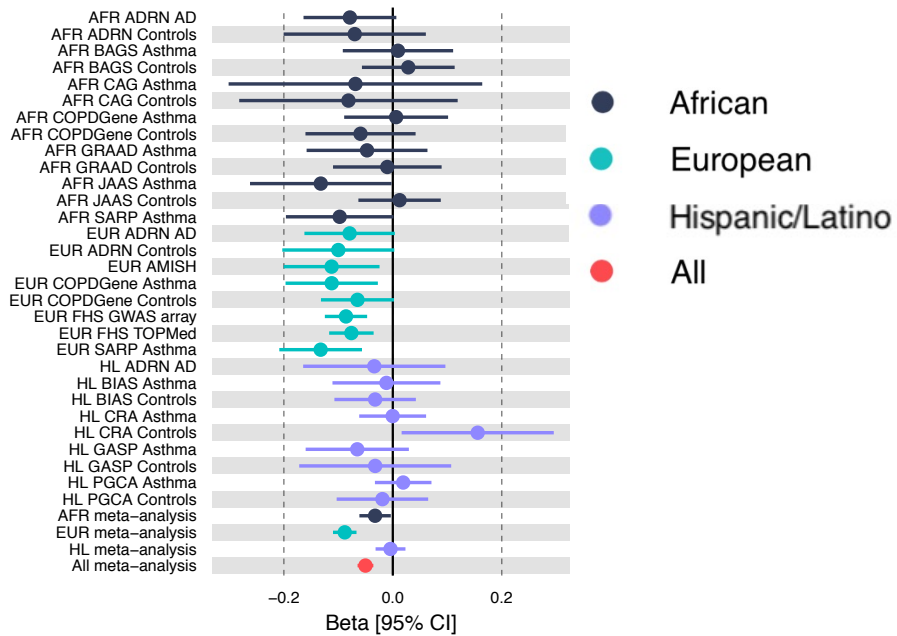**chr6p21.32 rs3104371**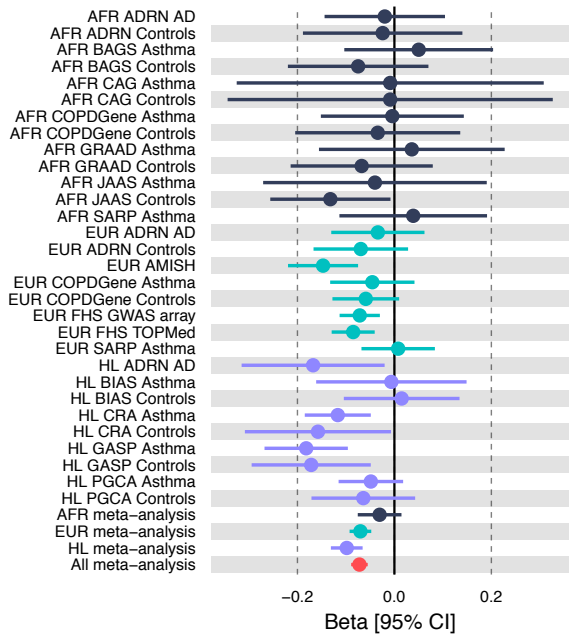**chr11q13.5 rs7936323**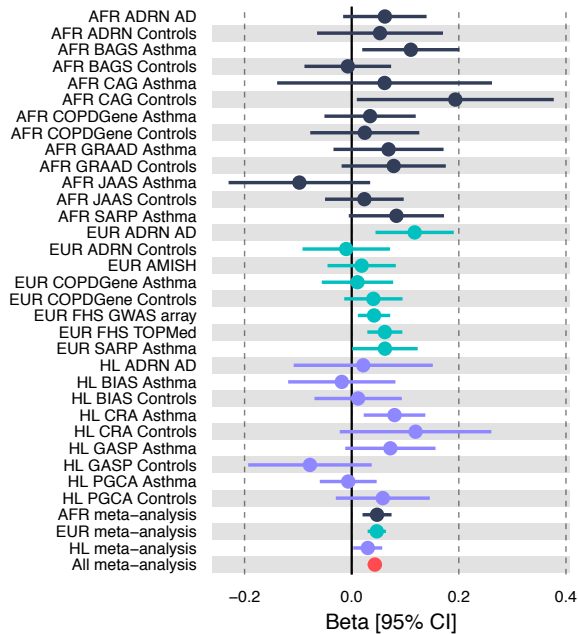**chr12q13.3 rs1059513**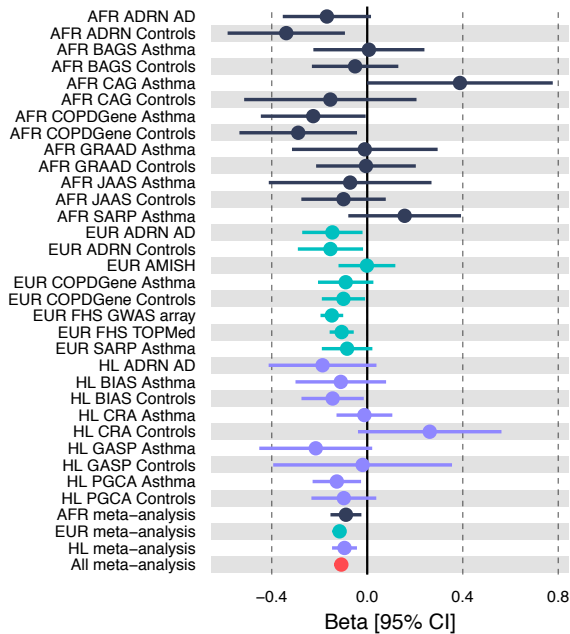**chr15q22.2 rs1059513**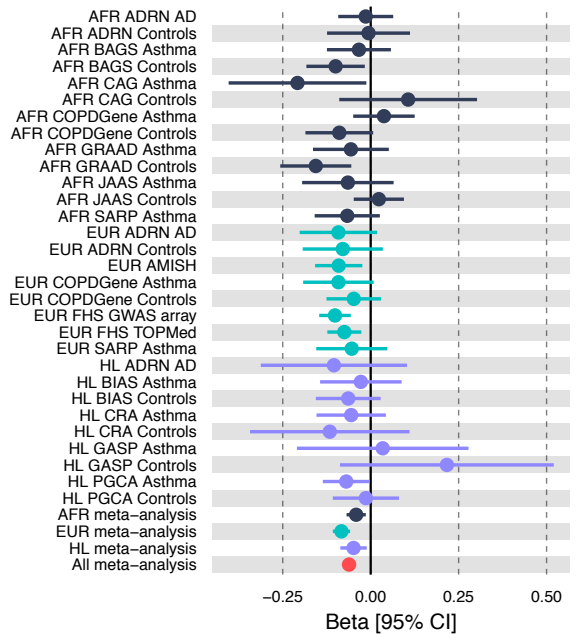

Supplement: NIHMS1749845-supplement-7.pdf [file NIHMS1749845-supplement-7.pdf]

**chr1q23.2 rs2251746**

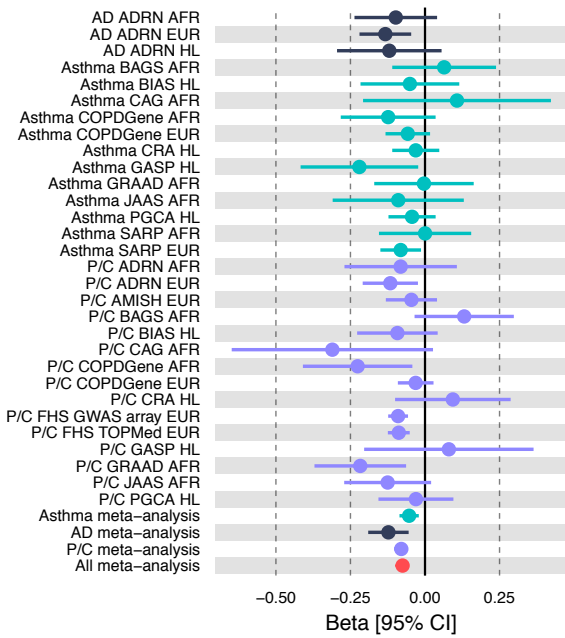

**chr5q31.1 rs1295686**

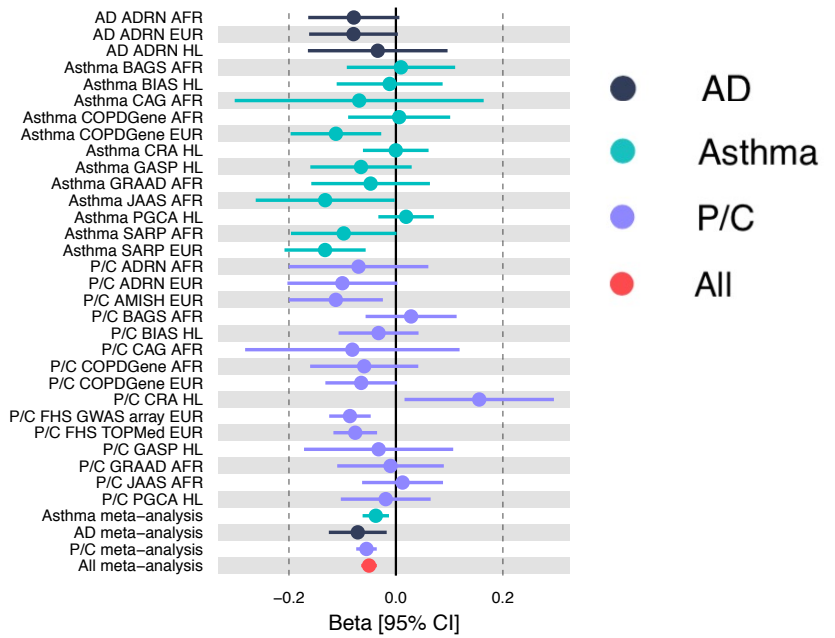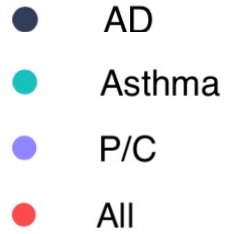

**chr6p21.32 rs3104371**

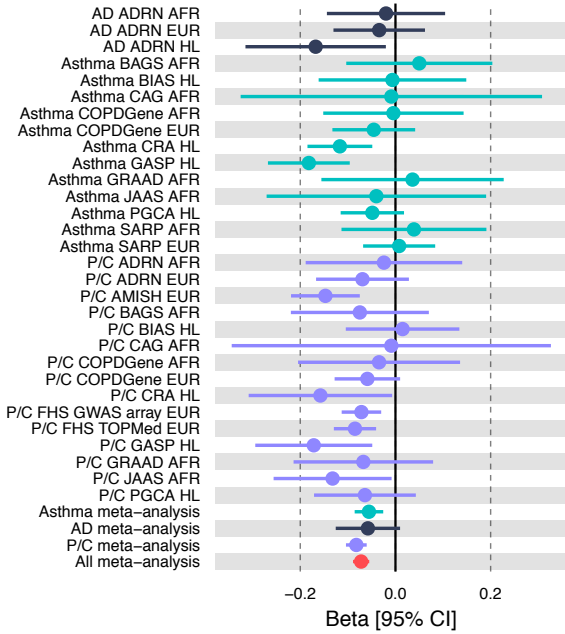

**chr11q13.5 rs7936323**

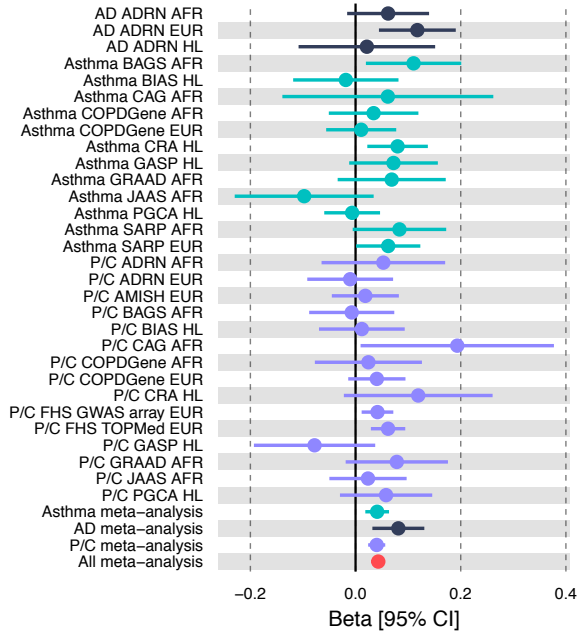

**chr12q13.3 rs1059513**

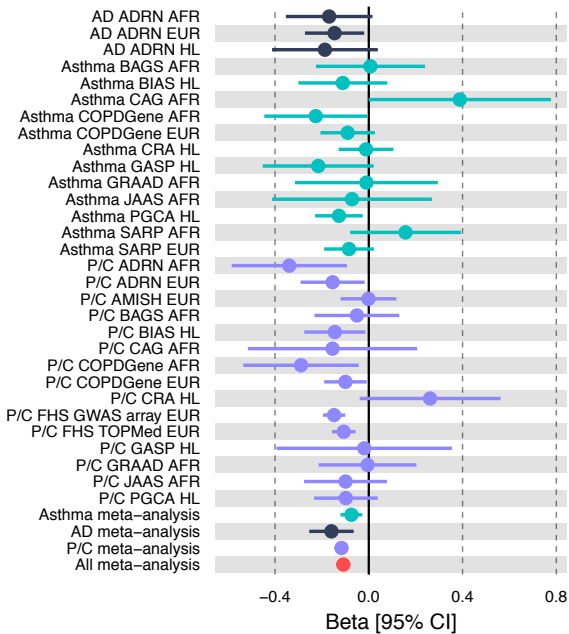

**chr15q22.2 rs1059513**

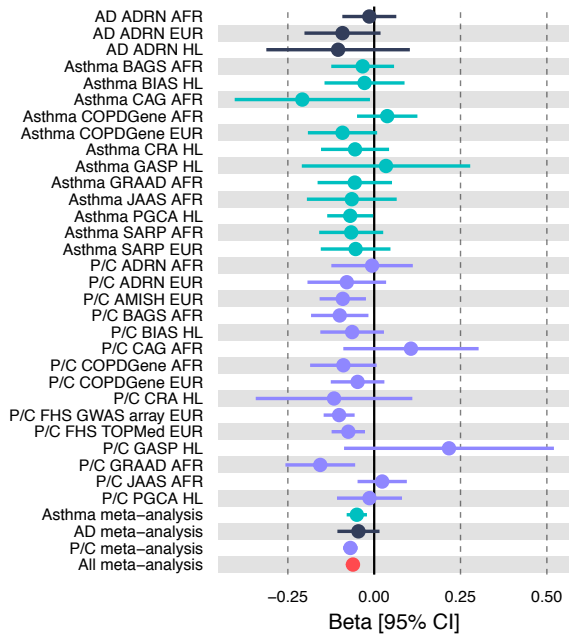

Supplement: NIHMS1749845-supplement-8.pdf [file NIHMS1749845-supplement-8.pdf]
